# Supplementary material for: The Characteristics Variation of Hepatic Progenitors after TGF‐β1‐Induced Transition and EGF‐Induced Reversion
Source: Hindawi journal article supplement (doi:10.1155/2016/6304385), 2016-01-01
Supplement: f1 [file 6304385.f1.pdf]

rvdTABLE S1. Primers Designed With Rat-Specific Genes for RT-PCR

| Name          | Accession no. | Primer sequence (5'-3')                                   | Product (bp) |
|---------------|---------------|-----------------------------------------------------------|--------------|
| AFP           | NM_012493     | GGAGAAGTGCTGCAAAGACC<br>TTGTCCTTTCTTCCTCCTGG              | 120          |
| ALB           | NM_134326     | AGAACCAGGCCACTATCTC<br>CAGATCGGCAGGAATGTTGT               | 110          |
| $\alpha$ -SMA | NM_031004.2   | F: GTCCCAGACACCAGGGAGTGA<br>R: TCGGATACTTCAGGGTCAGGA      | 102          |
| CK19          | NM_199498     | CAGCAGTATTGAAGTCCAGC<br>TCAAGCAGGCTTCGGTAGGT              | 139          |
| Col-I         | NM_053304.1   | F: CATG TTCAGCTTTGTGGACCT<br>R: GCAGCTGACTTCAGGGATGT      | 94           |
| GAPDH         | NM_017008.4   | F: CCTGCCAAGTATGATGACATCAAGA<br>R: GTAGCCCAGGATGCCCTTTAGT | 75           |
